# Supplementary material for: Amazonian Triatomine Biodiversity and the Transmission of Chagas Disease in French Guiana: In Medio Stat Sanitas
Source: PubMed Central journal article supplement (PMC4750908; doi:10.1371/journal.pntd.0004427), 2016-02-11
Supplement: pntd.0004427.s001.pdf [file pntd.0004427.s001.pdf]

| Index                     | Field site              | DMS (Degree, Minute, Second) |                   |
|---------------------------|-------------------------|------------------------------|-------------------|
|                           |                         | Latitude                     | Longitude         |
| <b>Coastal plain</b>      |                         |                              |                   |
| 1                         | Saint Laurent du Maroni | N 5° 29' 44.002"             | O 54° 1' 50.998"  |
| 2                         | Awala-Yalimapo          | N 5° 41' 27.764"             | O 53° 55' 56.657" |
| 3                         | Iracoubo                | N 5° 29' 46.2"               | O 53° 12' 14.039" |
| 4                         | Macouria                | N 4° 55' 16.751"             | O 52° 29' 21.087" |
| 5                         | Cayenne                 | N 4° 55' 21.72"              | O 52° 19' 36.84"  |
| 6                         | Matoury                 | N 4° 50' 49.92"              | O 52° 19' 51.959" |
| 7                         | Roura                   | N 4° 37' 42.384"             | O 52° 16' 17.76"  |
| 8                         | Ouanary                 | N 4° 12' 32.76"              | O 51° 40' 15.24"  |
| <b>Northern chain</b>     |                         |                              |                   |
| 9                         | Kaw                     | N 4° 30' 52.667"             | O 52° 3' 59.667"  |
| 10                        | Régina                  | N 4° 18' 34.842"             | O 52° 8' 3.044"   |
| 11                        | Montsinéry-Tonnegrande  | N 4° 43' 7.933"              | O 52° 29' 21.087" |
| 12                        | Apatou                  | N 5° 9' 14.041"              | O 54° 20' 23.58"  |
| <b>Central massif</b>     |                         |                              |                   |
| 13                        | Trinité                 | N 4° 35' 20"                 | O 53° 18' 1"      |
| 14                        | Bélizon                 | N 4° 16' 35.458"             | O 52° 38' 35.382" |
| 15                        | Saint Georges           | N 3° 53' 20.04"              | O 51° 48' 4.319"  |
| 16                        | Armontabo               | N 3° 43' 54.0"               | O 52° 19' 11.1"   |
| 17                        | Nouragues               | N 4° 02' 2.268"              | O 52° 40' 1.728"  |
| <b>Inini-Camopi chain</b> |                         |                              |                   |
| 18                        | Papaichton              | N 3° 48' 25.2"               | O 54° 8' 58.199"  |
| 19                        | Antecum Pata            | N 3° 15' 0.751"              | O 54° 6' 47.373"  |
| 20                        | Haut Coursibo           | N 3° 43' 54.0"               | O 53° 19' 11.1"   |
| 21                        | Saül                    | N 3° 51' 37.691"             | O 53° 18' 15.402" |
| 22                        | Camopi                  | N 3° 9' 55.8"                | O 52° 20' 27.959" |

**Table** : Field sites and their spatial coordinates.
