# Supplementary material for: Amazonian Triatomine Biodiversity and the Transmission of Chagas Disease in French Guiana: In Medio Stat Sanitas
Source: PubMed Central journal article supplement (PMC4750908; doi:10.1371/journal.pntd.0004427), 2016-02-11
Supplement: pntd.0004427.s002.pdf [file pntd.0004427.s002.pdf]

| Model                     | Abundance    |             |            |               | Diversity    |                  |            |                      |
|---------------------------|--------------|-------------|------------|---------------|--------------|------------------|------------|----------------------|
|                           | LLH          | AIC         | $\Delta_i$ | $\omega_i$    | LLH          | AIC <sub>c</sub> | $\Delta_i$ | $\omega_i$           |
| 1 : CP=NC=CM=IC           | <b>-15.1</b> | <b>32.1</b> | <b>0</b>   | <b>0.1410</b> | -79.9        | 175.9            | 42.5       | $5.9 \cdot 10^{-10}$ |
| 2 : CP=NC=CM vs IC        | -14.9        | 33.8        | 1.67       | 0.0610        | -64.3        | 161.4            | 28         | $8.3 \cdot 10^{-7}$  |
| 3 : CP=NC=IC vs CM        | -14.7        | 33.4        | 1.34       | 0.0722        | -61.0        | 154.7            | 21.3       | $2.4 \cdot 10^{-5}$  |
| 4 : CP=CM=IC vs NC        | -14.6        | 33.1        | 1          | 0.0853        | -62.1        | 157              | 23.6       | $7.6 \cdot 10^{-6}$  |
| 5 : NC=CM=IC vs CP        | -14.4        | 32.8        | 0.69       | 0.0997        | -76.0        | 184.8            | 51.4       | $7.1 \cdot 10^{-12}$ |
| 6 : CP=NC vs CM=IC        | -15.0        | 34.0        | 1.93       | 0.0537        | -68.3        | 169.4            | 36         | $1.5 \cdot 10^{-8}$  |
| 7 : CP=CM vs NC=IC        | -14.1        | 32.2        | 0.06       | 0.1370        | -66.8        | 166.3            | 32.9       | $7.3 \cdot 10^{-8}$  |
| 8 : CP=IC vs NC=CM        | -15.1        | 34.1        | 2          | 0.0520        | -57.3        | 147.3            | 13.8       | $9.9 \cdot 10^{-4}$  |
| 9 : CP=NC vs CM vs IC     | -14.7        | 35.4        | 3.31       | 0.0269        | -50.8        | 151.2            | 17.8       | $1.4 \cdot 10^{-4}$  |
| 10 : CP=CM vs NC vs IC    | -14.0        | 34.0        | 1.92       | 0.0540        | -48.9        | 147.5            | 14         | $9.1 \cdot 10^{-4}$  |
| 11 : CP=IC vs NC vs CM    | -14.5        | 34.9        | 2.81       | 0.0346        | <b>-41.9</b> | <b>133.4</b>     | <b>0</b>   | <b>0.9975</b>        |
| 12 : NC=CM vs CP vs IC    | -14.3        | 34.7        | 2.57       | 0.0390        | -56.5        | 162.6            | 29.2       | $4.7 \cdot 10^{-7}$  |
| 13 : NC=IC vs CP vs CM    | -13.8        | 33.6        | 1.52       | 0.0658        | -59.0        | 167.6            | 34.2       | $3.8 \cdot 10^{-8}$  |
| 14 : CM=IC vs CP vs NC    | -14.1        | 34.1        | 2          | 0.0518        | -58.6        | 167              | 33.5       | $5.2 \cdot 10^{-8}$  |
| 15 : CP vs NC vs CM vs IC | -13.7        | 35.5        | 3.38       | 0.0260        | -41.1        | 149.2            | 15.7       | $3.9 \cdot 10^{-4}$  |

**Table A** : Model selection approach applied to spatial variations in triatomines' overall abundance and diversity.

## S2 Table (Péneau et al.)

| Model                        | LLH         | AICc        | $\Delta_i$ | $\omega_i$    |
|------------------------------|-------------|-------------|------------|---------------|
| <b><i>P. geniculatus</i></b> |             |             |            |               |
| 1 : CP=NC=CM=IC              | -15         | 32          | 8          | 0.0060        |
| 2 : CP=NC=CM vs IC           | -10.7       | 25.4        | 1.4        | 0.1656        |
| 3 : CP=NC=IC vs CM           | -13.6       | 31.2        | 7.3        | 0.0089        |
| 4 : CP=CM=IC vs NC           | -13.4       | 30.9        | 6.9        | 0.0105        |
| 5 : NC=CM=IC vs CP           | -14.8       | 33.6        | 9.6        | 0.0027        |
| 6 : CP=NC vs CM=IC           | -14.2       | 32.4        | 8.5        | 0.0048        |
| 7 : CP=CM vs NC=IC           | -14.2       | 32.5        | 8.6        | 0.0046        |
| <b>8 : CP=IC vs NC=CM</b>    | <b>-10</b>  | <b>23.9</b> | <b>0</b>   | <b>0.3375</b> |
| 9 : CP=NC vs CM vs IC        | -10.6       | 27.3        | 3.4        | 0.0623        |
| 10 : CP=CM vs NC vs IC       | -10.5       | 27          | 3.1        | 0.0719        |
| 11 : CP=IC vs NC vs CM       | -9.9        | 25.9        | 2          | 0.1252        |
| 12 : NC=CM vs CP vs IC       | -9.8        | 25.7        | 1.8        | 0.1405        |
| 13 : NC=IC vs CP vs CM       | -13.5       | 33.2        | 9.2        | 0.0034        |
| 14 : CM=IC vs CP vs NC       | -13.4       | 32.8        | 8.8        | 0.0041        |
| 15 : CP vs NC vs CM vs IC    | -9.8        | 27.7        | 3.7        | 0.0519        |
| <b><i>R. pictipes</i></b>    |             |             |            |               |
| 1 : CP=NC=CM=IC              | -11.8       | 25.7        | 8.6        | 0.0039        |
| 2 : CP=NC=CM vs IC           | -10.5       | 25.1        | 8          | 0.0053        |
| <b>3 : CP=NC=IC vs CM</b>    | <b>-6.5</b> | <b>17</b>   | <b>0</b>   | <b>0.2934</b> |
| 4 : CP=CM=IC vs NC           | -9.5        | 23          | 6          | 0.0147        |
| 5 : NC=CM=IC vs CP           | -11.8       | 27.7        | 10.6       | 0.0014        |
| 6 : CP=NC vs CM=IC           | -9.4        | 22.9        | 5.8        | 0.0160        |
| 7 : CP=CM vs NC=IC           | -6.8        | 17.6        | 0.58       | 0.2192        |
| 8 : CP=IC vs NC=CM           | -10.4       | 24.9        | 7.9        | 0.0057        |
| 9 : CP=NC vs CM vs IC        | -6.4        | 19.1        | 2.1        | 0.1034        |
| 10 : CP=CM vs NC vs IC       | -6.7        | 19.7        | 2.6        | 0.0785        |
| 11 : CP=IC vs NC vs CM       | -6.4        | 19.1        | 2          | 0.1071        |
| 12 : NC=CM vs CP vs IC       | -10.4       | 27          | 9.9        | 0.0020        |
| 13 : NC=IC vs CP vs CM       | -6.4        | 19.1        | 2.0        | 0.1061        |
| 14 : CM=IC vs CP vs NC       | -9.3        | 24.9        | 7.8        | 0.0059        |
| 15 : CP vs NC vs CM vs IC    | -6.4        | 21.2        | 4.1        | 0.0372        |

**Table B** : Model selection approach applied to spatial distribution of the infection of the four main vector species by *T. cruzi*

## S2 Table (Péneau et al.)

| Model                       | LLH         | AICc        | $\Delta_i$ | $\omega_i$    |
|-----------------------------|-------------|-------------|------------|---------------|
| <b><i>P. lignarius</i></b>  |             |             |            |               |
| 1 : CP=NC=CM=IC             | -8.3        | 18.7        | 4          | 0.0318        |
| <b>2 : CP=NC=CM vs IC</b>   | <b>-5.3</b> | <b>14.7</b> | <b>0</b>   | <b>0.2378</b> |
| 3 : CP=NC=IC vs CM          | -7.4        | 19          | 4.3        | 0.0275        |
| 4 : CP=CM=IC vs NC          | -7.1        | 18.5        | 3.8        | 0.0358        |
| 5 : NC=CM=IC vs CP          | -7.6        | 19.4        | 4.7        | 0.0224        |
| 6 : CP=NC vs CM=IC          | -6.8        | 17.8        | 3.1        | 0.0500        |
| 7 : CP=CM vs NC=IC          | -6.3        | 16.8        | 2          | 0.0859        |
| 8 : CP=IC vs NC=CM          | -6.6        | 17.5        | 2.8        | 0.0590        |
| 9 : CP=NC vs CM vs IC       | -5.1        | 16.7        | 2          | 0.0883        |
| 10 : CP=CM vs NC vs IC      | -4.7        | 15.7        | 1          | 0.1439        |
| 11 : CP=IC vs NC vs CM      | -6          | 18.5        | 3.8        | 0.0363        |
| 12 : NC=CM vs CP vs IC      | -5.3        | 16.9        | 2.2        | 0.0786        |
| 13 : NC=IC vs CP vs CM      | -6.3        | 18.9        | 4.2        | 0.0289        |
| 14 : CM=IC vs CP vs NC      | -6.3        | 19          | 4.3        | 0.0274        |
| 15 : CP vs NC vs CM vs IC   | -4.6        | 18          | 3.3        | 0.0465        |
| <b><i>E. mucronatus</i></b> |             |             |            |               |
| 1 : CP=NC=CM=IC             | -6.9        | 15.8        | 0.53       | 0.1305        |
| 2 : CP=NC=CM vs IC          | -6.6        | 17.5        | 2.2        | 0.0566        |
| <b>3 : CP=NC=IC vs CM</b>   | <b>-5.5</b> | <b>15.3</b> | <b>0</b>   | <b>0.1703</b> |
| 4 : CP=CM=IC vs NC          | -6.5        | 17.2        | 2.0        | 0.0633        |
| 5 : NC=CM=IC vs CP          | -6.9        | 17.9        | 2.7        | 0.0453        |
| 6 : CP=NC vs CM=IC          | -6.5        | 17.2        | 1.9        | 0.0653        |
| 7 : CP=CM vs NC=IC          | -5.8        | 15.7        | 0.46       | 0.1354        |
| 8 : CP=IC vs NC=CM          | -6.6        | 17.4        | 2.1        | 0.0588        |
| 9 : CP=NC vs CM vs IC       | -5.5        | 17.5        | 2.2        | 0.0566        |
| 10 : CP=CM vs NC vs IC      | -5.7        | 17.9        | 2.7        | 0.0452        |
| 11 : CP=IC vs NC vs CM      | -5.5        | 17.5        | 2.2        | 0.0570        |
| 12 : NC=CM vs CP vs IC      | -6.6        | 19.6        | 4.3        | 0.0194        |
| 13 : NC=IC vs CP vs CM      | -5.5        | 17.5        | 2.2        | 0.0565        |
| 14 : CM=IC vs CP vs NC      | -6.5        | 19.4        | 4.1        | 0.0218        |
| 15 : CP vs NC vs CM vs IC   | -5.5        | 19.7        | 4.5        | 0.0181        |

**Table B** : Model selection approach applied to spatial distribution of the infection of the four main vector species by *T. cruzi*

## S2 Table (Péneau et al.)

**Exact Simpson index:**

$$D_1 = 1 - \frac{1}{n_{\cdot,l}(n_{\cdot,l} - 1)} \sum_s [n_{s,l} (n_{s,l} - 1)]$$

where  $n_{\cdot,l}$  is the observed number of individuals of all species in landscape l, and  $n_{s,l}$  the observed numbers of individuals of each species s in landscape l.

**Equitability index:**

$$E_1 = \frac{D_1}{D_{1 \max}}$$

where  $D_1$  is the exact Simpson index value in landscape l and  $D_{1 \max}$  the highest exact Simpson index value for the given number of species and the sample size in landscape l.

**S2 Table (Péneau et al.)**
