# Supplementary material for: Amazonian Triatomine Biodiversity and the Transmission of Chagas Disease in French Guiana: In Medio Stat Sanitas
Source: PubMed Central journal article supplement (PMC4750908; doi:10.1371/journal.pntd.0004427), 2016-02-11
Supplement: pntd.0004427.s003.pdf [file pntd.0004427.s003.pdf]

| Month          | Triatomine abundance<br>Rank (#/night) | Rainfall<br>Rank (mm) | Average Temperature<br>Rank (°C) | Minimal Temperature<br>Rank (°C) | Maximal Temperature<br>Rank (°C) | Max-Min Temperature<br>Rank (°C) |
|----------------|----------------------------------------|-----------------------|----------------------------------|----------------------------------|----------------------------------|----------------------------------|
| January        | 7 (2.14)                               | 4 (330)               | 12 (26.2)                        | 5.5 (23.22)                      | 12 (29.42)                       | 11 (6.20)                        |
| February       | 2 (4.22)                               | 7 (250)               | 11 (26.25)                       | 4 (23.30)                        | 11(29.48)                        | 12 (6.18)                        |
| March          | 9 (1.48)                               | 5 (260)               | 10 (26.6)                        | 3 (23.44)                        | 10 (29.88)                       | 9 (6.44)                         |
| April          | 11 (0.40)                              | 2 (360)               | 5 (26.85)                        | 1 (23.68)                        | 8 (30.1)                         | 10 (6.42)                        |
| May            | 12 (0.35)                              | 1 (440)               | 6.5 (26.8)                       | 2 (23.54)                        | 9 (30.06)                        | 8 (6.52)                         |
| June           | 8 (1.62)                               | 3 (335)               | 8.5 (26.7)                       | 7 (22.92)                        | 7 (30.32)                        | 6 (7.4)                          |
| July           | 10 (1.44)                              | 8 (195)               | 6.5 (26.8)                       | 11 (22.46)                       | 5 (30.92)                        | 5 (8.46)                         |
| August         | 6 (2.33)                               | 9 (130)               | 3 (27.4)                         | 10 (22.50)                       | 4 (31.62)                        | 3 (9.12)                         |
| September      | 1 (5.30)                               | 12 (50)               | 2 (27.5)                         | 12 (22.40)                       | 2 (32.3)                         | 2 (9.9)                          |
| October        | 5 (3.33)                               | 11 (55)               | 1 (27.65)                        | 9 (22.60)                        | 1 (32.56)                        | 1 (9.96)                         |
| November       | 4 (3.70)                               | 10 (125)              | 4 (27.2)                         | 8 (22.84)                        | 3 (31.88)                        | 4 (9.04)                         |
| December       | 3 (3.80)                               | 6 (255)               | 8.5 (26.7)                       | 5.5 (23.22)                      | 6 (30.46)                        | 7 (7.24)                         |
| <b>Rho</b>     |                                        | -0.720                | 0.151                            | -0.469                           | 0.364                            | 0.315                            |
| <b>p-value</b> |                                        | 0.0055                | 0.6801                           | 0.0619                           | 0.8816                           | 0.8228                           |

**Table** : Correlation between triatomine abundance (per night) and basic environmental variables. The strength of the correlation was tested using algorithm AS 89 [1] implemented in function cor.test from R [2].

1. Best D, Roberts D. Algorithm AS 89: the upper tail probabilities of Spearman's rho. Applied Statistics. 1975:377-9.

2. R Development Core Team. R: A language and environment for statistical computing. R Foundation for Statistical Computing, Vienna, Austria. ISBN 3-900051-07-0, URL: <http://www.R-project.org/>. 2010
