# Supplementary material for: Amazonian Triatomine Biodiversity and the Transmission of Chagas Disease in French Guiana: In Medio Stat Sanitas
Source: PubMed Central journal article supplement (PMC4750908; doi:10.1371/journal.pntd.0004427), 2016-02-11
Supplement: pntd.0004427.s004.pdf [file pntd.0004427.s004.pdf]

| Triatomine community             |     |                                                                         |        |        | <i>T. cruzi</i> infection      |
|----------------------------------|-----|-------------------------------------------------------------------------|--------|--------|--------------------------------|
| Species                          | Nb  | Habitat<br>(sampling methodology)                                       | D      | E      | Infection<br>(positive/tested) |
| French Guiana. This study        |     |                                                                         |        |        |                                |
| <i>P. geniculatus</i>            | 459 | Wild<br>(light traps)                                                   | 0.5692 | 0.6496 | 189/395                        |
| <i>R. pictipes</i>               | 108 |                                                                         |        |        | 44/104                         |
| <i>P. lignarius</i>              | 63  |                                                                         |        |        | 33/59                          |
| <i>E. mucronatus</i>             | 61  |                                                                         |        |        | 17/58                          |
| <i>P. rufotuberculatus</i>       | 18  |                                                                         |        |        | 9/14                           |
| <i>R. robustus</i>               | 16  |                                                                         |        |        | 5/15                           |
| <i>R. amazonicus</i>             | 4   |                                                                         |        |        | 2/4                            |
| <i>R. paraensis</i>              | 2   |                                                                         |        |        | 0/2                            |
| French Guiana [1]                |     |                                                                         |        |        |                                |
| <i>P. geniculatus</i>            | 100 | Outside/ Mixed<br>environment<br>(light traps)                          | 0.7811 | 0.8560 | No available data              |
| <i>R. pictipes</i>               | 50  |                                                                         |        |        |                                |
| <i>P. lignarius</i>              | 20  |                                                                         |        |        |                                |
| <i>E. mucronatus</i>             | 40  |                                                                         |        |        |                                |
| <i>P. rufotuberculatus</i>       | 20  |                                                                         |        |        |                                |
| <i>R. robustus</i>               | 20  |                                                                         |        |        |                                |
| <i>R. amazonicus</i>             | 5   |                                                                         |        |        |                                |
| <i>R. paraensis</i>              | 3   |                                                                         |        |        |                                |
| <i>C. pilosa</i>                 | 3   |                                                                         |        |        |                                |
| <i>M. trinidadensis</i>          | 1   |                                                                         |        |        |                                |
| <i>P. mitarakaensis</i>          | 1   |                                                                         |        |        |                                |
| State of Pará, Belem, Brazil [2] |     |                                                                         |        |        |                                |
| <i>P. geniculatus</i>            | 11  | Mixed environment,<br>mainly forest<br>and some houses<br>(light traps) | 0.6921 | 0.7675 | Qualitative data               |
| <i>R. pictipes</i>               | 272 |                                                                         |        |        |                                |
| <i>P. lignarius</i>              | 89  |                                                                         |        |        |                                |
| <i>E. mucronatus</i>             | 55  |                                                                         |        |        |                                |
| <i>R. robustus</i>               | 23  |                                                                         |        |        |                                |
| <i>P. rufotuberculatus</i>       | 1   |                                                                         |        |        |                                |
| <i>R. paraensis</i>              | 4   |                                                                         |        |        |                                |
| <i>M. trinidadensis</i>          | 50  |                                                                         |        |        |                                |
| <i>B. herreri</i>                | 4   |                                                                         |        |        |                                |
| <i>T. rubrofasciata</i>          | 27  |                                                                         |        |        |                                |

**Table :** Review of the Amazonian biodiversity of *Triatominae*. For each published study, we reported the identified triatomine species, the number of individuals collected for each of them, the sampling environment and methodology. We use this information to calculate standard indices of biodiversity (Exact Simpson D, Magurran 2004 p. 114-115, Equitability E, Heip et al 1998), and we reported the data on *T. cruzi* infection when this was assessed.

|                                               |      |                                                                                |        |        |                   |
|-----------------------------------------------|------|--------------------------------------------------------------------------------|--------|--------|-------------------|
| Amazon rainforest, Brazil [3]                 |      |                                                                                |        |        |                   |
| <i>P. geniculatus</i>                         | 38   | Primary rainforest<br>(light traps)                                            | 0.6796 | 0.7823 | No available data |
| <i>R. pictipes</i>                            | 2    |                                                                                |        |        |                   |
| <i>P. lignarius</i>                           | 9    |                                                                                |        |        |                   |
| <i>E. mucronatus</i>                          | 17   |                                                                                |        |        |                   |
| <i>P. rufotuberculatus</i>                    | 3    |                                                                                |        |        |                   |
| <i>R. robustus</i>                            | 5    |                                                                                |        |        |                   |
| <i>R. amazonicus</i>                          | 1    |                                                                                |        |        |                   |
| Surinam [4]                                   |      |                                                                                |        |        |                   |
| <i>P. geniculatus</i>                         | 87   | 3 Museum<br>collections                                                        | 0.5584 | 0.6500 | No available data |
| <i>R. pictipes</i>                            | 268  |                                                                                |        |        |                   |
| <i>P. lignarius</i>                           | 3    |                                                                                |        |        |                   |
| <i>E. mucronatus</i>                          | 13   |                                                                                |        |        |                   |
| <i>P. rufotuberculatus</i>                    | 16   |                                                                                |        |        |                   |
| <i>R. robustus</i>                            | 41   |                                                                                |        |        |                   |
| <i>T. maculata</i>                            | 1    |                                                                                |        |        |                   |
| <i>P. geniculatus</i>                         | 14   | Houses<br>(rural environment,<br>opportunistic sampling<br>attracted by light) | 0.4556 | 0.5665 | No available data |
| <i>R. pictipes</i>                            | 137  |                                                                                |        |        |                   |
| <i>P. lignarius</i>                           | 1    |                                                                                |        |        |                   |
| <i>P. rufotuberculatus</i>                    | 9    |                                                                                |        |        |                   |
| <i>R. robustus</i>                            | 30   |                                                                                |        |        |                   |
| French Guiana [5]                             |      |                                                                                |        |        |                   |
| <i>P. geniculatus</i>                         | 46   | Forest<br>(black light traps)                                                  | 0.5841 | 0.7204 | 35/48             |
| <i>R. pictipes</i>                            | 11   |                                                                                |        |        |                   |
| <i>P. lignarius</i>                           | 1    |                                                                                |        |        |                   |
| <i>E. mucronatus</i>                          | 9    |                                                                                |        |        |                   |
| <i>P. rufotuberculatus</i>                    | 8    |                                                                                |        |        |                   |
| Provincia de Jaén, Cajamarca Region, Peru [6] |      |                                                                                |        |        |                   |
| <i>P. geniculatus</i>                         | 83   | Houses<br>(active research)                                                    | 0.1095 | 0.136  | No available data |
| <i>R. robustus</i>                            | 4    |                                                                                |        |        |                   |
| <i>P. herrei</i>                              | 4721 |                                                                                |        |        |                   |
| <i>P. chinai</i>                              | 197  |                                                                                |        |        |                   |
| <i>R. ecuadoriensis</i>                       | 4    |                                                                                |        |        |                   |
| <i>P. geniculatus</i>                         | 12   | Outside,<br>house environment<br>(active research)                             | 0.0866 | 0.1297 |                   |
| <i>P. herrei</i>                              | 534  |                                                                                |        |        |                   |
| <i>P. chinai</i>                              | 13   |                                                                                |        |        |                   |

|                                                       |     |                                             |        |        |                   |
|-------------------------------------------------------|-----|---------------------------------------------|--------|--------|-------------------|
| State of Pará, Belem, Brazil [7]                      |     |                                             |        |        |                   |
| <i>P. geniculatus</i>                                 | 22  | Burrow                                      | 0.5920 | 0.7359 | 65/118            |
| <i>P. lignarius</i>                                   | 2   |                                             |        |        |                   |
| <i>R. pictipes</i>                                    | 50  | Palm                                        |        |        |                   |
| <i>R. robustus</i>                                    | 103 |                                             |        |        |                   |
| <i>M. trinidadensis</i>                               | 5   | Bromeliads                                  |        |        |                   |
| Furo do Rio Pau Grande Amazon Basin [8]               |     |                                             |        |        |                   |
| <i>P. geniculatus</i>                                 | 21  | Houses<br>(flashlight)                      | 0.5222 | 0.7588 | 1/5               |
| <i>R. pictipes</i>                                    | 7   |                                             |        |        | 1/4               |
| <i>P. lignarius</i>                                   | 4   |                                             |        |        |                   |
| <i>P. geniculatus</i>                                 | 418 | Pigisties<br>(flashlight)                   | 0.0674 | 0.0897 | 20/118            |
| <i>R. pictipes</i>                                    | 12  |                                             |        |        | 0/3               |
| <i>P. lignarius</i>                                   | 2   |                                             |        |        |                   |
| <i>E. mucronatus</i>                                  | 1   |                                             |        |        |                   |
| <i>P. geniculatus</i>                                 | 9   | Palm<br>(trees dissection)                  | 0.5737 | 0.8175 | 2/9               |
| <i>R. pictipes</i>                                    | 10  |                                             |        |        | 3/10              |
| <i>P. lignarius</i>                                   | 1   |                                             |        |        | 0/1               |
| Brazil [9]                                            |     |                                             |        |        |                   |
| <i>R. pictipes</i>                                    | 535 | Palm<br>(trees dissection)                  | 0.5516 | 0.7349 | No available data |
| <i>P. lignarius</i>                                   | 49  |                                             |        |        |                   |
| <i>R. robustus</i>                                    | 553 |                                             |        |        |                   |
| <i>M. trinidadensis</i>                               | 14  |                                             |        |        |                   |
| Paço do Lumiar County, state of Maranhão, Brazil [10] |     |                                             |        |        |                   |
| <i>R. pictipes</i>                                    | 89  | Palm trees<br>(trees dissection)            | 0.4875 | 0.7257 | 68%               |
| <i>P. lignarius</i>                                   | 11  |                                             |        |        | 27%               |
| <i>R. neglectus</i>                                   | 33  |                                             |        |        | 39%               |
| <i>R. pictipes</i>                                    | 36  | Houses<br>(capture by<br>household members) | 0.4344 | 0.8521 | 28%               |
| <i>P. lignarius</i>                                   | /   |                                             |        |        | /                 |
| <i>R. neglectus</i>                                   | 16  |                                             |        |        | 31%               |
| Manaus, state of Amazonas, Brazil [11]                |     |                                             |        |        |                   |
| <i>P. geniculatus</i>                                 | 5   | Mixed environment                           |        |        | 0/5               |
| <i>R. pictipes</i>                                    | 85  | Mainly forest area                          | 0.4081 | 0.4720 | 5/85              |
| <i>R. robustus</i>                                    | 25  | (bait trap)                                 |        |        | 2/25              |
| Tapajós River Region, State of Pará, Brazil [12]      |     |                                             |        |        |                   |
| <i>R. pictipes</i>                                    | 3   | Palm trees<br>(trees dissection)            | 0.0107 | 0.0161 | 125/740           |
| <i>P. lignarius</i>                                   | 1   |                                             |        |        |                   |
| <i>R. robustus</i>                                    | 739 |                                             |        |        |                   |
| Ouro Preto do Oeste, State of Rondônia, Brazil [13]   |     |                                             |        |        |                   |
| <i>R. robustus</i>                                    | 459 | Palm trees<br>(trees dissection)            | 0.1319 | 0.2633 | 176/494           |
| <i>R. prolixus</i>                                    | 350 |                                             |        |        |                   |

1. Berenger J-M, Pluot-Sigwalt D, Pages F, Blanchet D, Aznar C. The triatominae species of French Guiana (Heteroptera: Reduviidae). *Memorias Do Instituto Oswaldo Cruz*. 2009;104(8):1111-6.
2. Miles MA, Desouza AA, Povia M. Chagas disease in the Amazon Basin 3. Ecotopes of 10 Triatomine bug species (Hemiptera, Reduviidae) from the Vicinity of Belem, Para state, Brazil. *Journal of Medical Entomology*. 1981;18(4):266-78.
3. Castro MCM, Barrett TV, Santos WS, Abad-Franch F, Rafael JA. Attraction of Chagas disease vectors (Triatominae) to artificial light sources in the canopy of primary Amazon rainforest. *Memorias Do Instituto Oswaldo Cruz*. 2010;105(8):1061-4.
4. Hiwat H. Triatominae species of Suriname (Heteroptera: Reduviidae) and their role as vectors of Chagas disease. *Memorias Do Instituto Oswaldo Cruz*. 2014;109(4):452-8.
5. Dedet JP, Chippaux JP, Goyot P, Pajot FX, Tibayrenc M, Geoffroy B, et al. Natural hosts of Chagas-Disease in French Guiana - High-frequency of *Trypanosoma cruzi* zymodeme 1 in wild marsupialia. *Annales De Parasitologie Humaine Et Comparee*. 1985;60(2):111-7.
6. Cáceres AG, Troyes L, Gonzáles-Pérez A, Llontop E, Bonilla C, Heredia N, et al. Enfermedad de Chagas en la región nororiental del Perú. I. Triatominos (Hemiptera, Reduviidae) presentes en Cajamarca y Amazonas. *Revista Peruana de Medicina Experimental y Salud Pública*. 2002;19(1):17-23.
7. Mascarenhas BM, Sampaio Nunes de Mello S. Triatomíneos de Amazônia: ocorrência de triatomíneos na área do reservatório da Hidrelétrica de Tucuruí (Pará) e observações sobre o ciclo evolutivo de *Rhodnius robustus* Larrousse, 1927 (Hemiptera, Reduviidae, Triatominae). *Acta amazonica*. 1986;16:607-15.
8. Valente VC, Valente SAS, Noireau F, Carrasco HJ, Miles MA. Chagas disease in the Amazon basin: Association of *Panstrongylus geniculatus* (Hemiptera : Reduviidae) with domestic pigs. *Journal of Medical Entomology*. 1998;35(2):99-103.
9. Miles MA, Arias JR, de Souza AA. Chagas' disease in the Amazon basin: V. Periurban palms as habitats of *Rhodnius robustus* and *Rhodnius pictipes* - Triatomine vectors of Chagas' disease. *Memorias do Instituto Oswaldo Cruz*. 1983;78(4):391-8.
10. Teixeira ARL, Monteiro PS, Rebelo JM, Arganaraz ER, Vieira D, Lauria-Pires L, et al. Emerging Chagas disease: Trophic network and cycle of transmission of *Trypanosoma cruzi* from palm trees in the Amazon. *Emerging Infectious Diseases*. 2001;7(1):100-12.
11. Fe NF, Magalhaes LK, Fe FA, Arakian SK, Monteiro WM, Vale Barbosa MdG. Occurrences of triatomines in wild and domestic environments in the municipality of Manaus, State of Amazonas. *Revista Da Sociedade Brasileira De Medicina Tropical*. 2009;42(6):642-6.
12. Stehling Dias FB, Quartier M, Diotaiuti L, Mejia G, Harry M, Lima ACL, et al. Ecology of *Rhodnius robustus* Larrousse, 1927 (Hemiptera, Reduviidae, Triatominae) in Attalea palm trees of the Tapajos River Region (Para State, Brazilian Amazon). *Parasites & Vectors*. 2014;7.
13. de Oliveira Meneguetti DU, Trevisan O, Aranha Camargo LM, Rosa RM. Natural infection of triatomines (Hemiptera: Reduviidae) by trypanosomatids in two different environments in the municipality of Ouro Preto do Oeste, State of Rondonia, Brazil. *Revista Da Sociedade Brasileira De Medicina Tropical*. 2012;45(3):395-8.
